# Supplementary material
Source: PubMed Central journal article supplement (PMC2851845)
Supplement: NIHMS152701-supplement-1.pdf [file NIHMS152701-supplement-1.pdf]

Type of file: figure

Label: 8

Filename: figure\_8.tif

**A**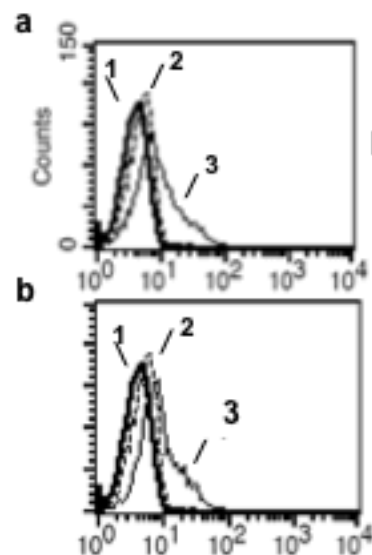

HLA A2/LUC

HLA A2

**B**

No insert  
LUC  
HLA A2/LUC

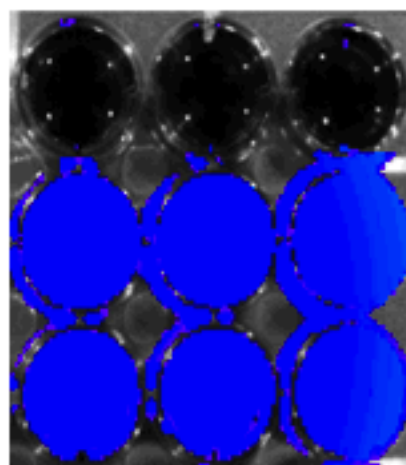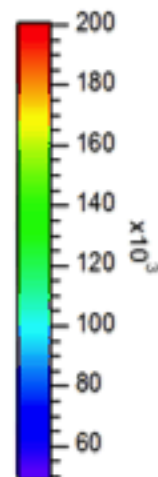**C**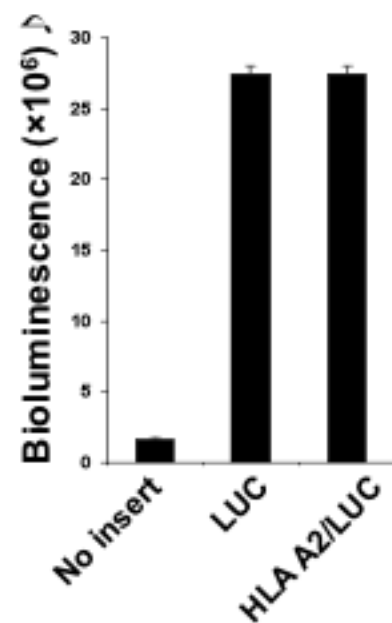

**Supplementary Figure 1. Characterization of HLA-A2 or Luc expression in cells transfected with pcDNA3-HLA-A2/Luc plasmid.** BHK-21 cells ( $4 \times 10^4$  per well) were transfected with pcDNA3-HLA-A2, pcDNA3-HLA-A2/Luc, pcDNA3-Luc or pcDNA3-No insert plasmid DNA. **(A)** Flow cytometry analysis to demonstrate expression of HLA-A2 in transfected cells. One day after transfection, transfected cells were analyzed by flow cytometry using HLA-A2 specific antibody. Bold line (1) represents untransfected cells, scattered line (2) represents pcDNA3-HLA-A2 or pcDNA3-HLA-A2/Luc transfected cells, and line (3) represents pcDNA3-No insert transfected cells. The data presented is a representation of two independent experiments. **(B)** Representative luminescence imaging depicting the luciferase expression level from pcDNA3-HLA-A2/Luc, pcDNA3-Luc or pcDNA3-No insert plasmid DNA transfected cells. **(C)** Bar graph depicting the quantification of luminescence intensity in each transfected cells. The data presented is a representation of two independent experiments.

Type of file: figure

Label: 9

Filename: figure\_9.tif

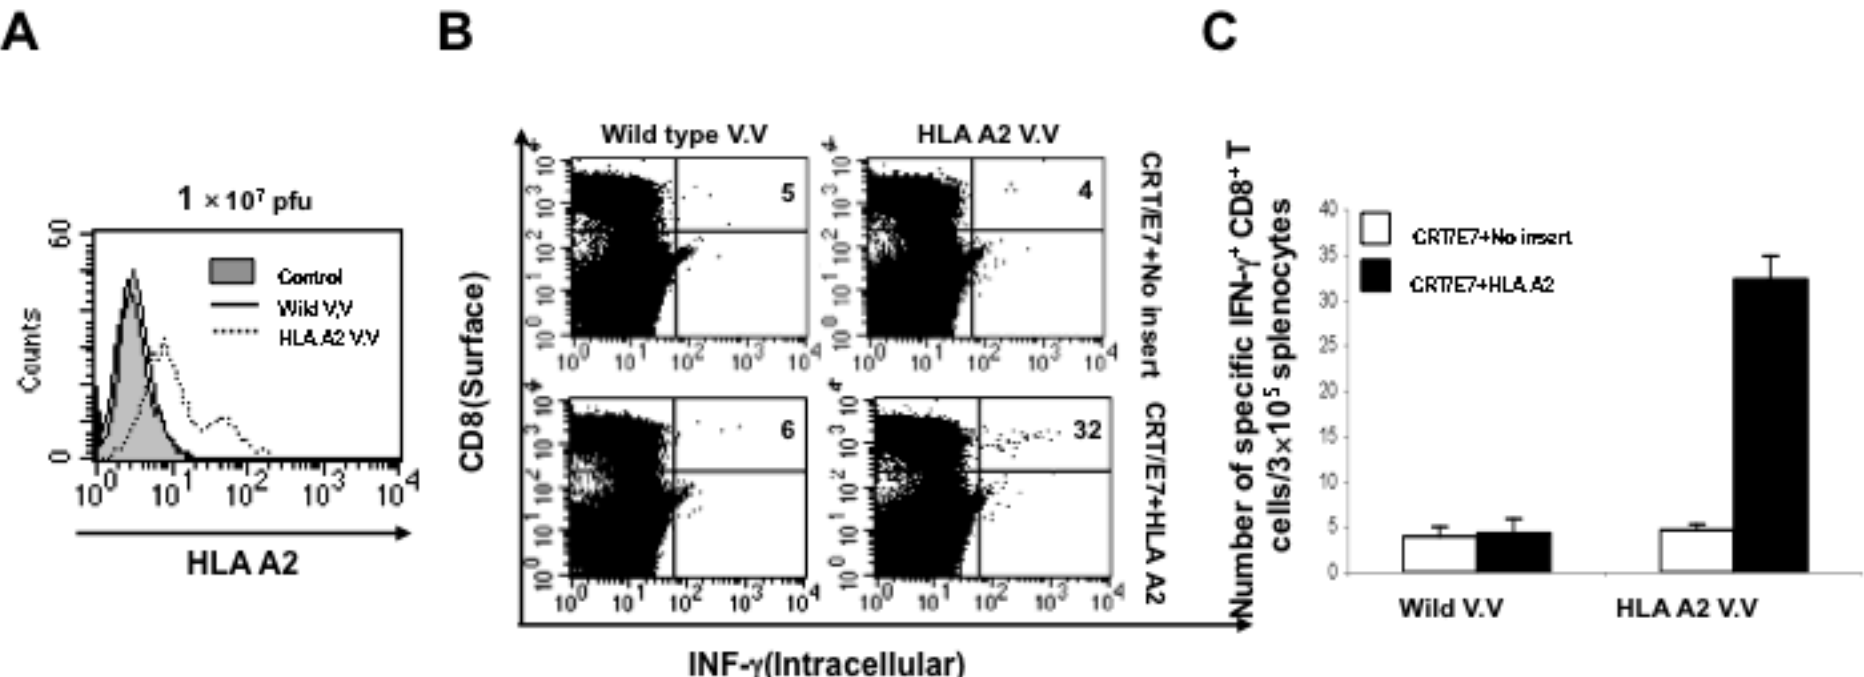

**Supplementary Figure 2. Intracellular cytokine staining followed by flow cytometry analysis to characterize the HLA-A2-specific CD8<sup>+</sup> T cell immune response in vaccinated mice.** C57BL/6 mice (5 per group) were immunized with CRT/E7 DNA mixed with no insert or HLA-A2 DNA. One week after the last vaccination, splenocytes from vaccinated mice were harvested. 1 × 10<sup>7</sup> pfu of wild type (wild type VV) or HLA-A2 expressed vaccinia virus (HLA-A2 VV) were infected into 1 × 10<sup>6</sup> DC-1 cells. One day later, these cells were incubated with splenocytes from vaccinated mice for 16 hours. Cells were characterized for HLA-A2-specific CD8<sup>+</sup> T cells using intracellular IFN-γ staining followed by flow cytometry analysis. **(A)** Flow cytometry analysis to characterize HLA-A2 expression on DC-1 cells infected with wild type VV or HLA-A2 VV. PE-conjugated HLA-A2 antibody was used to detect HLA-A2 expression. The isotype antibody was used as the negative control (grey profile). **(B)** Representative data of intracellular cytokine staining followed by flow cytometry analysis showing the number of HLA-A2-specific IFNγ<sup>+</sup> CD8<sup>+</sup> T cells in the various groups (right upper quadrant). **(C)** Bar graph depicting the numbers of HLA-A2-specific IFN-γ-secreting CD8<sup>+</sup> T cells per 3 × 10<sup>5</sup> pooled splenocytes (mean ± s.d.).
